# Supplementary material for: Antioxidant Responses Induced by PFAS Exposure in Freshwater Fish in the Veneto Region
Source: MDPI journal article supplement (doi:10.3390/antiox11061115), 2022-06-03
Supplement: s1 [file s1]

**Table S1.** Primer pairs used for qRT-PCR. Amplicon sizes and annealing temperatures (Ta) are also indicated.

| PRIMER             | Sequences 5'→3'               | Amplicon (bp) | Ta (°C) |
|--------------------|-------------------------------|---------------|---------|
| 3_FW_SOD2_GOBY_RT  | 5'- ACAAGATGTCTGCCGCCACA-3'   | 162           | 60      |
| 3_REV_SOD2_GOBY_RT | 5'- GCTCCACACGTCAATGCCC-3'    |               | 60      |
| go_GPX4b_b_fw      | 5'- TTGGAAGTGGATGAAGGCTC-3'   | 134           | 60      |
| go_GPX4b_b_rv      | 5'-CACTTGGATCATCTGTGGGG-3'    |               | 60      |
| sq_SOD2_b_fw       | 5'-CACTACAGGTCTCGTCCAC-3'     | 116           | 60      |
| sq_SOD2_b_rv       | 5'-CCCAGCTCACAACATTCCAG-3'    |               | 60      |
| 1_FW_GPX4_CAV_RT   | 5'- AGCGGACATAAAGGAGTTTGCT-3' | 199           | 60      |
| 1_RV_GPX4_CAV_RT   | 5'- CCTCTTCACGACCCGACCTT-3'   |               | 60      |
| sq_GAPDH_b_fw      | 5'-ATCACAGCCACACAGAAGAC-3'    | 126           | 60      |
| sq_GAPDH_b_rv      | 5'-AGGAATGACTTTGCCACAG-3'     |               | 60      |
